# Supplementary material for: Guidelines for the Surgical Management of Oral Cancer: Korean Society of Thyroid-Head and Neck Surgery
Source: PubMed Central journal article supplement — Clin Exp Otorhinolaryngol. 2019 Feb 2;12(2):107–44. doi: 10.21053/ceo.2018.01816 (PMC6453784; doi:10.21053/ceo.2018.01816), 2019-02-02
Supplement: ceo-2018-01816-suppl1.pdf [file ceo-2018-01816-suppl1.pdf]

Supplementary Table 1. Search keywords and recall ratio

| No.         | Keyword                                                                                                               | Total no. |
|-------------|-----------------------------------------------------------------------------------------------------------------------|-----------|
| Oral cancer |                                                                                                                       |           |
| #1          | Oral/exp OR mouth OR oris                                                                                             |           |
|             | EMBASE                                                                                                                | 1,122,240 |
|             | MEDLINE                                                                                                               | 218,525   |
|             | Cochrane Library                                                                                                      | 152,794   |
|             | KoreaMed                                                                                                              | 1,157     |
| #2          | Tongue* or gloss* or lingua*                                                                                          |           |
|             | EMBASE                                                                                                                | 53,777    |
|             | MEDLINE                                                                                                               | 38,423    |
|             | Cochrane Library                                                                                                      | 3,522     |
|             | KoreaMed                                                                                                              | 523       |
| #3          | "Mouth floor" or "floor of mouth" or sublingua* or "mouth floors" or "floors of mouth"                                |           |
|             | EMBASE                                                                                                                | 17,875    |
|             | MEDLINE                                                                                                               | 10,138    |
|             | Cochrane Library                                                                                                      | 3,585     |
|             | KoreaMed                                                                                                              | 244       |
| #4          | Gingiva* or gum* or "interdental papilla" or "alveolar process" or "alveolar processes" or "alveolar ridge"           |           |
|             | EMBASE                                                                                                                | 69,315    |
|             | MEDLINE                                                                                                               | 52,890    |
|             | Cochrane Library                                                                                                      | 8,923     |
|             | KoreaMed                                                                                                              | 61        |
| #5          | "Hard palate" or "hard palates" or "palatine bone"                                                                    |           |
|             | EMBASE                                                                                                                | 3,811     |
|             | MEDLINE                                                                                                               | 2,964     |
|             | Cochrane Library                                                                                                      | 83        |
|             | KoreaMed                                                                                                              | 190       |
| #6          | "Buccal mucosa" or "mouth mucosa" or "oral mucosa" or bucca* or "buccal mucosal" or "mouth mucosal" or "oral mucosal" |           |
|             | EMBASE                                                                                                                | 38,584    |
|             | MEDLINE                                                                                                               | 33,774    |
|             | Cochrane Library                                                                                                      | 3,470     |
|             | KoreaMed                                                                                                              | 150       |
| #7          | Retromola*                                                                                                            |           |
|             | EMBASE                                                                                                                | 806       |
|             | MEDLINE                                                                                                               | 590       |
|             | Cochrane Library                                                                                                      | 36        |
|             | KoreaMed                                                                                                              | 21        |
| #8          | Neoplasms OR cancer OR carcinoma OR malignant OR malignancy OR tumor OR tumour                                        |           |
|             | EMBASE                                                                                                                | 3,218,770 |
|             | MEDLINE                                                                                                               | 2,635,012 |
|             | Cochrane Library                                                                                                      | 150,817   |
|             | KoreaMed                                                                                                              | 15,668    |
| #9          | #1 OR #2 OR #3 OR #4 OR #5 OR #6 OR #7                                                                                |           |
|             | EMBASE                                                                                                                | 1,192,024 |
|             | MEDLINE                                                                                                               | 277,438   |
|             | Cochrane Library                                                                                                      | 151,249   |
|             | KoreaMed                                                                                                              | 3447      |
| #10         | #8 AND #9                                                                                                             |           |
|             | EMBASE                                                                                                                | 305,652   |
|             | MEDLINE                                                                                                               | 177,550   |
|             | Cochrane Library                                                                                                      | 20,107    |
|             | KoreaMed                                                                                                              | 687       |

(Continued to the next page)

## Clinical and Experimental Otorhinolaryngology

Supplementary Table 1. Continued

| No.                                         | Keyword                                                                                                                                | Total no. |
|---------------------------------------------|----------------------------------------------------------------------------------------------------------------------------------------|-----------|
| Diagnosis and work-up, role of laryngoscopy |                                                                                                                                        |           |
| #11                                         | ([#10] AND [biops* or bimanual]) AND diagnosis                                                                                         |           |
|                                             | EMBASE                                                                                                                                 | 20,245    |
|                                             | MEDLINE                                                                                                                                | 5,003     |
|                                             | Cochrane Library                                                                                                                       | 448       |
|                                             | KoreaMed                                                                                                                               | 125       |
| #12                                         | ([#10] AND ["vital staining" or autofluorescence or chemiluminescence or spectroscopy or "narrow band imaging"]) AND diagnosis         |           |
|                                             | EMBASE                                                                                                                                 | 778       |
|                                             | MEDLINE                                                                                                                                | 630       |
|                                             | Cochrane Library                                                                                                                       | 41        |
|                                             | KoreaMed                                                                                                                               | 65        |
| #13                                         | (#10) AND (performance OR "general condition")                                                                                         |           |
|                                             | EMBASE                                                                                                                                 | 10,079    |
|                                             | KoreaMed                                                                                                                               | 717       |
|                                             | Cochrane Library                                                                                                                       | 1,921     |
|                                             | KoreaMed                                                                                                                               | 16        |
| #14                                         | (#10) AND (second OR secondary OR "secondary malignancy" OR synchronous OR "synchronous malignancy") NOT PET                           |           |
|                                             | EMBASE                                                                                                                                 | 31,500    |
|                                             | MEDLINE                                                                                                                                | 9,470     |
|                                             | Cochrane Library                                                                                                                       | 4,591     |
|                                             | KoreaMed                                                                                                                               | 23        |
| Prevention (the risk factor analysis)       |                                                                                                                                        |           |
| #15                                         | #10 AND (tobacco* OR smok* OR cigar*)                                                                                                  |           |
|                                             | EMBASE                                                                                                                                 | 8,032     |
|                                             | MEDLINE                                                                                                                                | 7,103     |
|                                             | Cochrane Library                                                                                                                       | 1,260     |
|                                             | KoreaMed                                                                                                                               | 4         |
| #16                                         | #10 AND (alcohol* OR drink* OR ethanol* OR "alcoholic beverage" OR "alcoholic beverages" OR "alcohol beverage" OR "alcohol beverages") |           |
|                                             | EMBASE                                                                                                                                 | 6,517     |
|                                             | MEDLINE                                                                                                                                | 4,191     |
|                                             | Cochrane Library                                                                                                                       | 1,372     |
|                                             | KoreaMed                                                                                                                               | 4         |
| #17                                         | #10 AND (health* OR hygiene* OR care* OR device* OR Toothbrush* OR prosthesis OR prostheses OR implant* tooth* OR caries)              |           |
|                                             | EMBASE                                                                                                                                 | 5,348     |
|                                             | MEDLINE                                                                                                                                | 1,776     |
|                                             | Cochrane Library                                                                                                                       | 2,475     |
|                                             | KoreaMed                                                                                                                               | 12        |
| #18                                         | #10 AND (HPV OR "papilloma virus" OR "papilloma viruses")                                                                              |           |
|                                             | EMBASE                                                                                                                                 | 5,470     |
|                                             | MEDLINE                                                                                                                                | 2,269     |
|                                             | Cochrane Library                                                                                                                       | 152       |
|                                             | KoreaMed                                                                                                                               | 6         |
| Image work-up                               |                                                                                                                                        |           |
| Role of CT and MR                           |                                                                                                                                        |           |
| #19                                         | #10 AND (compute* AND tomograph*) OR CT.ti                                                                                             |           |
|                                             | EMBASE                                                                                                                                 | 24,707    |
|                                             | MEDLINE                                                                                                                                | 6,694     |
|                                             | Cochrane Library                                                                                                                       | 408       |
|                                             | KoreaMed                                                                                                                               | 10        |
| #20                                         | #10 AND mr*.ti OR (magnetic AND resonance)                                                                                             |           |
|                                             | EMBASE                                                                                                                                 | 21,531    |
|                                             | MEDLINE                                                                                                                                | 4,086     |

(Continued to the next page)

Supplementary Table 1. Continued

| No.                                 | Keyword                                                                                                                                                                                                                                                                                            | Total no. |
|-------------------------------------|----------------------------------------------------------------------------------------------------------------------------------------------------------------------------------------------------------------------------------------------------------------------------------------------------|-----------|
|                                     | Cochrane Library                                                                                                                                                                                                                                                                                   | 327       |
|                                     | KoreaMed                                                                                                                                                                                                                                                                                           | 2         |
| Role of PET and US                  |                                                                                                                                                                                                                                                                                                    |           |
| #21                                 | #10 AND (PET:ti OR (PET:ti AND CT:ti) OR (positron:ti AND emission:ti))                                                                                                                                                                                                                            |           |
|                                     | EMBASE                                                                                                                                                                                                                                                                                             | 34,309    |
|                                     | MEDLINE                                                                                                                                                                                                                                                                                            | 7,370     |
|                                     | Cochrane Library                                                                                                                                                                                                                                                                                   | 11        |
|                                     | KoreaMed                                                                                                                                                                                                                                                                                           | 0         |
| #22                                 | #10 AND (ultraso* or echogra* or sonogra*)                                                                                                                                                                                                                                                         |           |
|                                     | EMBASE                                                                                                                                                                                                                                                                                             | 11,685    |
|                                     | MEDLINE                                                                                                                                                                                                                                                                                            | 2,794     |
|                                     | Cochrane Library                                                                                                                                                                                                                                                                                   | 601       |
|                                     | KoreaMed                                                                                                                                                                                                                                                                                           | 2         |
| Surgical approaches for oral cancer |                                                                                                                                                                                                                                                                                                    |           |
| #23                                 | #10 AND ("surgical approach" OR "surgical approaches" OR intraoral OR transoral OR peroral OR "mandibulotomy" OR robot* OR "visor flap" OR "cheek flap" OR "lateral pharyngotomy" OR "pull-through" OR "lingual mandibular release" OR "mandibular lingual release" OR transcervical OR transneck) |           |
|                                     | EMBASE                                                                                                                                                                                                                                                                                             | 6,112     |
|                                     | MEDLINE                                                                                                                                                                                                                                                                                            | 4,167     |
|                                     | Cochrane Library                                                                                                                                                                                                                                                                                   | 329       |
|                                     | KoreaMed                                                                                                                                                                                                                                                                                           | 28        |
| #24                                 | #10 AND (margin* OR cosmetic* OR aesthetic* OR functional* OR survival* OR recurrence OR exposure OR "Quality of life")                                                                                                                                                                            |           |
|                                     | EMBASE                                                                                                                                                                                                                                                                                             | 2,836     |
|                                     | MEDLINE                                                                                                                                                                                                                                                                                            | 1,745     |
|                                     | Cochrane Library                                                                                                                                                                                                                                                                                   | 263       |
|                                     | KoreaMed                                                                                                                                                                                                                                                                                           | 16        |
| Surgical management                 |                                                                                                                                                                                                                                                                                                    |           |
| Oral tongue                         |                                                                                                                                                                                                                                                                                                    |           |
| #25                                 | #1 OR #2 AND #8 AND (glossectomy OR Surg* OR Operat* OR excision OR resection)                                                                                                                                                                                                                     |           |
|                                     | EMBASE                                                                                                                                                                                                                                                                                             | 30,141    |
|                                     | MEDLINE                                                                                                                                                                                                                                                                                            | 24,398    |
|                                     | Cochrane Library                                                                                                                                                                                                                                                                                   | 1,472     |
|                                     | KoreaMed                                                                                                                                                                                                                                                                                           | 870       |
| #26                                 | #25 AND margin                                                                                                                                                                                                                                                                                     |           |
|                                     | EMBASE                                                                                                                                                                                                                                                                                             | 136       |
|                                     | MEDLINE                                                                                                                                                                                                                                                                                            | 210       |
|                                     | Cochrane Library                                                                                                                                                                                                                                                                                   | 94        |
|                                     | KoreaMed                                                                                                                                                                                                                                                                                           | 4         |
| #27                                 | #25 AND ("depth of invasion" OR "tumor thickness")                                                                                                                                                                                                                                                 |           |
|                                     | EMBASE                                                                                                                                                                                                                                                                                             | 210       |
|                                     | MEDLINE                                                                                                                                                                                                                                                                                            | 184       |
|                                     | Cochrane Library                                                                                                                                                                                                                                                                                   | 0         |
|                                     | KoreaMed                                                                                                                                                                                                                                                                                           | 24        |
| Floor of the mouth                  |                                                                                                                                                                                                                                                                                                    |           |
| #28                                 | #1 OR #3 AND #8 AND (glossectomy OR Surg* OR Operat* OR excision OR resection)                                                                                                                                                                                                                     |           |
|                                     | EMBASE                                                                                                                                                                                                                                                                                             | 83,042    |
|                                     | MEDLINE                                                                                                                                                                                                                                                                                            | 43,920    |
|                                     | Cochrane Library                                                                                                                                                                                                                                                                                   | 3,221     |
|                                     | KoreaMed                                                                                                                                                                                                                                                                                           | 749       |
| #29                                 | #1 OR #3 AND #8 AND (glossectomy OR Surg* OR Operat* OR excision OR resection) AND margin                                                                                                                                                                                                          |           |
|                                     | EMBASE                                                                                                                                                                                                                                                                                             | 1,265     |
|                                     | MEDLINE                                                                                                                                                                                                                                                                                            | 927       |
|                                     | Cochrane Library                                                                                                                                                                                                                                                                                   | 170       |
|                                     | KoreaMed                                                                                                                                                                                                                                                                                           | 3         |

(Continued to the next page)

## Clinical and Experimental Otorhinolaryngology

Supplementary Table 1. Continued

| No.                                  | Keyword                                                                                                             | Total no. |
|--------------------------------------|---------------------------------------------------------------------------------------------------------------------|-----------|
| #30                                  | #1 OR #3 AND #8 AND (glossectomy OR Surg* OR Operat* OR excision OR resection) AND (depth OR invasion OR thickness) |           |
|                                      | EMBASE                                                                                                              | 6,113     |
|                                      | MEDLINE                                                                                                             | 2,530     |
|                                      | Cochrane Library                                                                                                    | 744       |
|                                      | KoreaMed                                                                                                            | 493       |
| Gingiva and hard palate              |                                                                                                                     |           |
| #31                                  | (#1 OR #4 OR #5) AND #8                                                                                             |           |
|                                      | EMBASE                                                                                                              | 116,484   |
|                                      | MEDLINE                                                                                                             | 110,985   |
|                                      | Cochrane Library                                                                                                    | 19,892    |
|                                      | KoreaMed                                                                                                            | 24        |
| #32                                  | #31 AND (surg* OR operat* OR excision OR resection OR Maxill* OR Laser OR Alveol* OR Palat*) AND Margin             |           |
|                                      | EMBASE                                                                                                              | 1,103     |
|                                      | MEDLINE                                                                                                             | 1,425     |
|                                      | Cochrane Library                                                                                                    | 312       |
|                                      | KoreaMed                                                                                                            | 0         |
| #33                                  | #31 AND (surg* OR operat* OR excision OR resection OR Mandibulec* OR Laser) AND Margin                              |           |
|                                      | EMBASE                                                                                                              | 1,073     |
|                                      | MEDLINE                                                                                                             | 1,280     |
|                                      | Cochrane Library                                                                                                    | 309       |
|                                      | KoreaMed                                                                                                            | 0         |
| Buccal mucosa and retromolar trigone |                                                                                                                     |           |
| #34                                  | (([#1 OR #2 OR #3] AND #4) and [surg* OR opert* OR excision* OR resection]) and margin                              |           |
|                                      | EMBASE                                                                                                              | 2,286     |
|                                      | MEDLINE                                                                                                             | 932       |
|                                      | Cochrane Library                                                                                                    | 42        |
|                                      | KoreaMed                                                                                                            | 56        |
| #35                                  | (([#1 OR #2 OR #3] AND #4) and (margin* OR buccinator OR deep* OR "buccal fat"))                                    |           |
|                                      | EMBASE                                                                                                              | 1,620     |
|                                      | MEDLINE                                                                                                             | 902       |
|                                      | Cochrane Library                                                                                                    | 576       |
|                                      | KoreaMed                                                                                                            | 197       |
| #36                                  | (([#1 OR #2 OR #3] AND #4) and (chew* or dysphagia or trismus or coronoid*))                                        |           |
|                                      | EMBASE                                                                                                              | 2,865     |
|                                      | MEDLINE                                                                                                             | 7,804     |
|                                      | Cochrane Library                                                                                                    | 134       |
|                                      | KoreaMed                                                                                                            | 58        |
| Neck management in oral cancer       |                                                                                                                     |           |
| #37                                  | Neck OR cervical OR lymph* OR node OR dissection                                                                    |           |
|                                      | EMBASE                                                                                                              | 2,431,051 |
|                                      | MEDLINE                                                                                                             | 850,533   |
|                                      | Cochrane Library                                                                                                    | 43,445    |
|                                      | KoreaMed                                                                                                            | 25,612    |
| #38                                  | #10 AND #37                                                                                                         |           |
|                                      | EMBASE                                                                                                              | 66,628    |
|                                      | MEDLINE                                                                                                             | 12,299    |
|                                      | Cochrane Library                                                                                                    | 3,951     |
|                                      | KoreaMed                                                                                                            | 0         |
| Soft tissue reconstruction           |                                                                                                                     |           |
| #39                                  | Reconstruction OR flap OR skin graft OR primary closure OR secondary healing                                        |           |
|                                      | EMBASE                                                                                                              | 228,200   |
|                                      | MEDLINE                                                                                                             | 145,638   |
|                                      | Cochrane Library                                                                                                    | 9,482     |
|                                      | KoreaMed                                                                                                            | 282       |

(Continued to the next page)

Supplementary Table 1. Continued

| No.                                  | Keyword                                                                                                                                                                                                                                                                                                                                                                                                                                                     | Total no.                                                                                                       |  |
|--------------------------------------|-------------------------------------------------------------------------------------------------------------------------------------------------------------------------------------------------------------------------------------------------------------------------------------------------------------------------------------------------------------------------------------------------------------------------------------------------------------|-----------------------------------------------------------------------------------------------------------------|--|
| #40                                  | #10 AND #39                                                                                                                                                                                                                                                                                                                                                                                                                                                 |                                                                                                                 |  |
|                                      | EMBASE                                                                                                                                                                                                                                                                                                                                                                                                                                                      | 9,338                                                                                                           |  |
|                                      | MEDLINE                                                                                                                                                                                                                                                                                                                                                                                                                                                     | 5,682                                                                                                           |  |
|                                      | Cochrane Library                                                                                                                                                                                                                                                                                                                                                                                                                                            | 368                                                                                                             |  |
| #41                                  | KoreaMed                                                                                                                                                                                                                                                                                                                                                                                                                                                    | 40                                                                                                              |  |
|                                      | #6 AND #40                                                                                                                                                                                                                                                                                                                                                                                                                                                  |                                                                                                                 |  |
|                                      | EMBASE                                                                                                                                                                                                                                                                                                                                                                                                                                                      | 954                                                                                                             |  |
|                                      | MEDLINE                                                                                                                                                                                                                                                                                                                                                                                                                                                     | 877                                                                                                             |  |
| Mandible reconstruction              | Cochrane Library                                                                                                                                                                                                                                                                                                                                                                                                                                            | 71                                                                                                              |  |
|                                      | KoreaMed                                                                                                                                                                                                                                                                                                                                                                                                                                                    | 12                                                                                                              |  |
|                                      | #42                                                                                                                                                                                                                                                                                                                                                                                                                                                         | Mandibular osteotom* OR mandibulectom* OR (mandib* AND resection) OR hemimandibulectom* OR (mandib* AND margin) |  |
|                                      | EMBASE                                                                                                                                                                                                                                                                                                                                                                                                                                                      | 11,503                                                                                                          |  |
| #43                                  | MEDLINE                                                                                                                                                                                                                                                                                                                                                                                                                                                     | 5,462                                                                                                           |  |
|                                      | Cochrane Library                                                                                                                                                                                                                                                                                                                                                                                                                                            | 340                                                                                                             |  |
|                                      | KoreaMed                                                                                                                                                                                                                                                                                                                                                                                                                                                    | 89                                                                                                              |  |
|                                      | #10 AND #42                                                                                                                                                                                                                                                                                                                                                                                                                                                 |                                                                                                                 |  |
| #44                                  | EMBASE                                                                                                                                                                                                                                                                                                                                                                                                                                                      | 3,063                                                                                                           |  |
|                                      | MEDLINE                                                                                                                                                                                                                                                                                                                                                                                                                                                     | 2,195                                                                                                           |  |
|                                      | Cochrane Library                                                                                                                                                                                                                                                                                                                                                                                                                                            | 23                                                                                                              |  |
|                                      | KoreaMed                                                                                                                                                                                                                                                                                                                                                                                                                                                    | 2                                                                                                               |  |
| #45                                  | (Mandib* AND reconstruction) OR (mandib* AND flap)                                                                                                                                                                                                                                                                                                                                                                                                          |                                                                                                                 |  |
|                                      | EMBASE                                                                                                                                                                                                                                                                                                                                                                                                                                                      | 11,641                                                                                                          |  |
|                                      | MEDLINE                                                                                                                                                                                                                                                                                                                                                                                                                                                     | 6,709                                                                                                           |  |
|                                      | Cochrane Library                                                                                                                                                                                                                                                                                                                                                                                                                                            | 344                                                                                                             |  |
| #46                                  | KoreaMed                                                                                                                                                                                                                                                                                                                                                                                                                                                    | 53                                                                                                              |  |
|                                      | #10 AND #44                                                                                                                                                                                                                                                                                                                                                                                                                                                 |                                                                                                                 |  |
|                                      | EMBASE                                                                                                                                                                                                                                                                                                                                                                                                                                                      | 2,413                                                                                                           |  |
|                                      | MEDLINE                                                                                                                                                                                                                                                                                                                                                                                                                                                     | 1,930                                                                                                           |  |
| #47                                  | Cochrane Library                                                                                                                                                                                                                                                                                                                                                                                                                                            | 20                                                                                                              |  |
|                                      | KoreaMed                                                                                                                                                                                                                                                                                                                                                                                                                                                    | 2                                                                                                               |  |
|                                      | (Mandib* AND reconstruction) AND (computer-aided OR computer-assisted design OR manufacturing)                                                                                                                                                                                                                                                                                                                                                              |                                                                                                                 |  |
|                                      | EMBASE                                                                                                                                                                                                                                                                                                                                                                                                                                                      | 405                                                                                                             |  |
| #48                                  | MEDLINE                                                                                                                                                                                                                                                                                                                                                                                                                                                     | 254                                                                                                             |  |
|                                      | Cochrane Library                                                                                                                                                                                                                                                                                                                                                                                                                                            | 15                                                                                                              |  |
|                                      | KoreaMed                                                                                                                                                                                                                                                                                                                                                                                                                                                    | 1                                                                                                               |  |
|                                      | #10 AND #46                                                                                                                                                                                                                                                                                                                                                                                                                                                 |                                                                                                                 |  |
| #49                                  | EMBASE                                                                                                                                                                                                                                                                                                                                                                                                                                                      | 98                                                                                                              |  |
|                                      | MEDLINE                                                                                                                                                                                                                                                                                                                                                                                                                                                     | 70                                                                                                              |  |
|                                      | Cochrane Library                                                                                                                                                                                                                                                                                                                                                                                                                                            | 1                                                                                                               |  |
|                                      | KoreaMed                                                                                                                                                                                                                                                                                                                                                                                                                                                    | 0                                                                                                               |  |
| Long-term follow-up and surveillance |                                                                                                                                                                                                                                                                                                                                                                                                                                                             |                                                                                                                 |  |
| #48                                  | #10 AND (neoplasm recurrence OR recurrenc* OR recur*) AND (follow OR follow-up OR surveillance) AND ([CT* OR computed OR tomograph* OR "computed tomography"] OR [MR* OR magnetic OR resonance OR "magnetic resonance" OR magnetic resonance image*] OR [PET OR positron OR PET-CT] OR [physical OR examination* OR "physical examination*"] OR [thyroid OR TFT OR "thyroid function test*"] OR [chest P* OR X-ray OR radiograph* OR "chest radiography*"]) |                                                                                                                 |  |
|                                      | EMBASE                                                                                                                                                                                                                                                                                                                                                                                                                                                      | 5,419                                                                                                           |  |
|                                      | MEDLINE                                                                                                                                                                                                                                                                                                                                                                                                                                                     | 2,062                                                                                                           |  |
|                                      | Cochrane Library                                                                                                                                                                                                                                                                                                                                                                                                                                            | 1,627                                                                                                           |  |
| Salvage surgery                      | KoreaMed                                                                                                                                                                                                                                                                                                                                                                                                                                                    | 14                                                                                                              |  |
|                                      | #49                                                                                                                                                                                                                                                                                                                                                                                                                                                         | Recur* AND (Surg* OR Opert* OR excision OR resection)                                                           |  |
|                                      | EMBASE                                                                                                                                                                                                                                                                                                                                                                                                                                                      | 223,272                                                                                                         |  |

(Continued to the next page)

## Clinical and Experimental Otorhinolaryngology

Supplementary Table 1. Continued

| No. | Keyword                                                | Total no. |
|-----|--------------------------------------------------------|-----------|
|     | MEDLINE                                                | 215,362   |
|     | Cochrane Library                                       | 18,843    |
|     | KoreaMed                                               | 8,647     |
| #50 | Salvage AND (Surg* OR Opert* OR excision OR resection) |           |
|     | EMBASE                                                 | 20,222    |
|     | MEDLINE                                                | 19,501    |
|     | Cochrane Library                                       | 1,365     |
|     | KoreaMed                                               | 393       |
| #51 | #10 AND (#39 OR #40)                                   |           |
|     | EMBASE                                                 | 16,213    |
|     | MEDLINE                                                | 14,830    |
|     | Cochrane Library                                       | 1,824     |
|     | KoreaMed                                               | 0         |
